# Supplementary material
Source: Springer Nature journal article supplement (https://www.springermedizin.de/resource/supplementary/12888_2012_1102_MOESM2_ESM.pdf/9479694)
Supplement: MOESM2 [file 9479694]

Records identified through  
database searching  
(n = 6672)

Additional records identified  
through other sources  
(n = 905)

Records after duplicates removed  
(n = 7546)

Records screened  
(n = 389)

Records excluded  
(n = 275)

Full-text articles  
assessed for eligibility  
(n = 114)

Full-text articles  
excluded, with reasons  
(n = 91)

Studies included in  
qualitative synthesis  
(n = 23)
